# Supplementary material
Source: publisher figshare collection journal article supplement (https://acs.figshare.com/ndownloader/files/3731572)
Supplement: Supplementary file 1 [file 3731572]

# Supporting Information

## Chalcogenization-Derived Band Gap Grading in Solution-Processed $\text{CuIn}_x\text{Ga}_{1-x}(\text{Se,S})_2$ Thin-Film Solar Cells

Se Jin Park,<sup>†,‡</sup> Hyo Sang Jeon,<sup>†</sup> Jin Woo Cho,<sup>§</sup> Yun Jeong Hwang,<sup>†</sup> Kyung Su Park,<sup>§</sup> Hyeong  
Seop Shim,<sup>||</sup> Jae Kyu Song,<sup>||</sup> Yunae Cho,<sup>⊥</sup> Dong-Wook Kim,<sup>⊥</sup> Jihyun Kim,<sup>‡</sup> and Byoung  
Koun Min<sup>\*,†,▽</sup>

<sup>†</sup>Clean Energy Research Center and <sup>§</sup>Advanced Analysis Center, Korea Institute of Science and  
Technology, Seoul, 02792, Korea,

<sup>‡</sup>Department of Chemical and Biological Engineering and <sup>▽</sup>Green School, Korea University, Seoul,  
02841, Korea

<sup>||</sup> Department of Chemistry, Kyung Hee University, Seoul, 02447, Korea

<sup>⊥</sup> Department of Physics, Ewha Womans University, Seoul, 03760, Korea

**\* Corresponding author:** B. K. Min, E-mail: bkmin@kist.re.kr. Tel.: +82 2 958 5853. Fax:  
+82 2 958 5809.

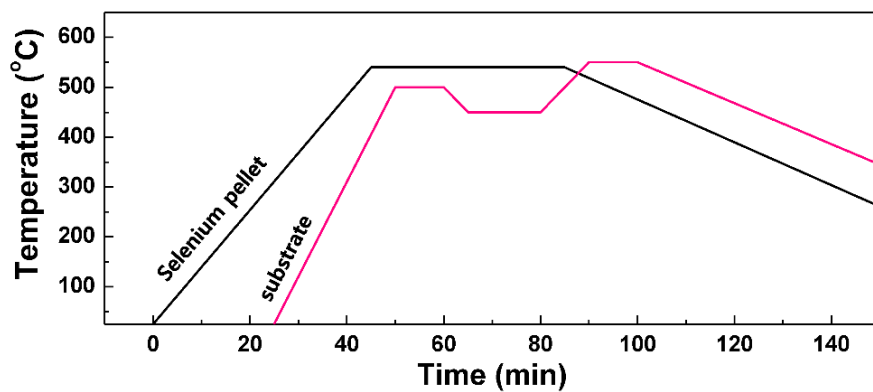

**Figure S1.** Temperature profiles of two zones of a tube furnace during selenization process.

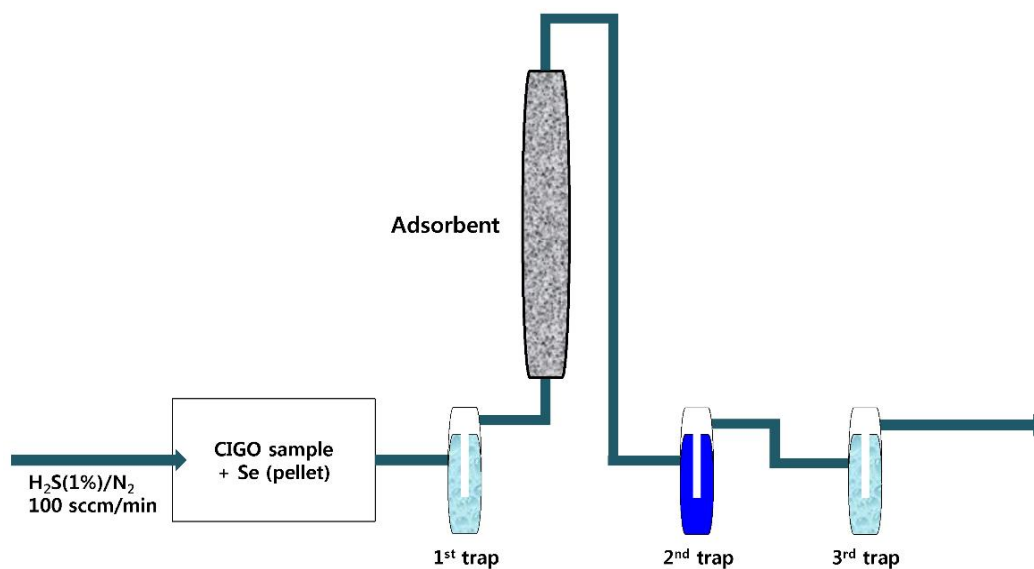

**Figure S2.** Schematic diagram of experimental setup for gas analysis and purification

For the synthesis of CIGSSe film, we attempted selenization under  $\text{H}_2\text{S}$  gas environment. In this process,  $\text{H}_2\text{Se}$  gas may be generated due to the reaction between  $\text{H}_2\text{S}$  and Se at high

temperature.  $\text{H}_2\text{Se}$  gas is a colorless and extremely toxic gas, thus requires caution and purification before releasing the gas to atmosphere. In order to check whether or not  $\text{H}_2\text{Se}$  gas is really generated, we prepared the setup as shown in Figure S2. First of all, the 1<sup>st</sup> trap with deionized (DI) water was connected to outlet of the reactor because  $\text{H}_2\text{Se}$  gas is soluble in water. Temperature of the trap was maintained at 4 °C because solubility of selenium in water is variable as temperature. Absorbent (PureSphere, Puresorb TA-301) was then connected to the outlet of the 1<sup>st</sup> trap to adsorb both  $\text{H}_2\text{Se}$  and  $\text{H}_2\text{S}$  gas. Sequentially, the 2<sup>nd</sup> trap with 0.1 M  $\text{CuSO}_4$  in DI water was connected to the outlet of the absorbent, followed by installation of the 3<sup>rd</sup> trap of DI water to confirm the complete removal of  $\text{H}_2\text{Se}$  gas before releasing the gas to atmosphere through an exhaust gas hood. When residual  $\text{H}_2\text{S}$  gas was dissolved in  $\text{CuSO}_4$  solution, a precipitate of  $\text{CuS}$  was formed due to the reaction:  $\text{H}_2\text{S} (\text{g}) + \text{CuSO}_4 (\text{aq}) \rightarrow \text{CuS} (\text{s}) + \text{H}_2\text{SO}_4 (\text{aq})$ .<sup>1</sup> Due to the black color of  $\text{CuS}$  precipitate, it is easy to confirm the ability of adsorbent. To quantify the generation of  $\text{H}_2\text{Se}$  gas the Se amount dissolved in the water trap was analyzed by inductively coupled plasma optical emission spectrometry (ICP-OES) showing 30 ppm. To exclude any influence of Se vapor from a Se pallet on the quantification we tested with similar procedure under only  $\text{N}_2$  gas without  $\text{H}_2\text{S}$  and no apparent Se in the 1<sup>st</sup> trap was detected by our ICP-OES. Notably, after passing the absorbent and the  $\text{CuSO}_4$  solution trap no  $\text{H}_2\text{S}$  and  $\text{H}_2\text{Se}$  gas was dissolved in 3<sup>rd</sup> DI water trap indicating that our purification procedure is assumed to be reliable.

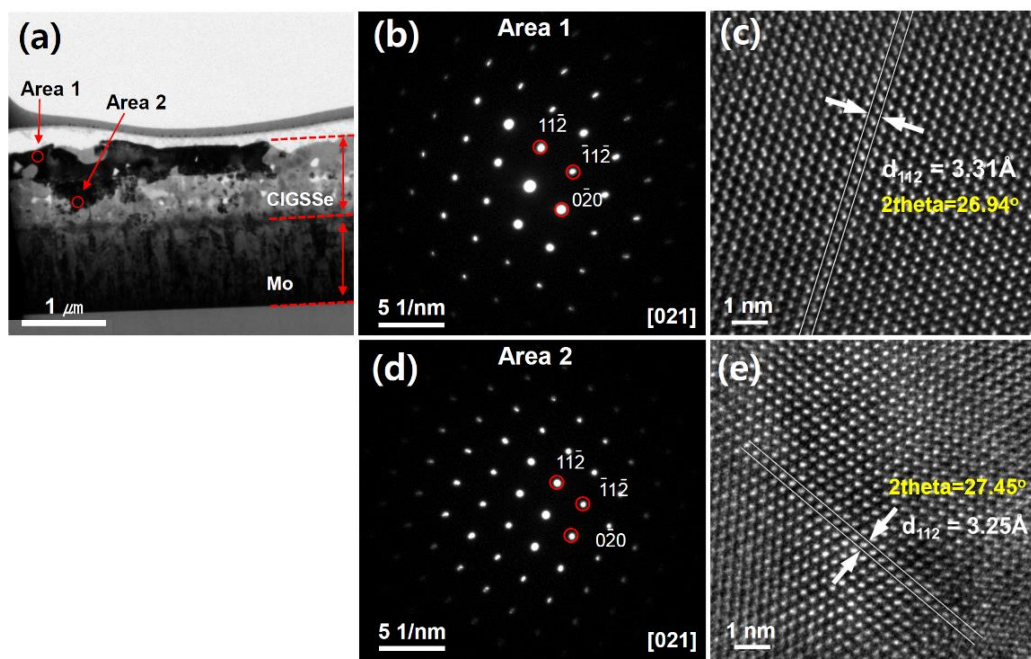

**Figure S3.** (a) Cross-sectional transmission electron microscopy (TEM) image of the CIGSSe film on Mo substrate, (b) and (d) selected area electron diffraction (SAED) patterns of the areas 1 and 2, and (c) and (e) high resolution TEM image of the selected area

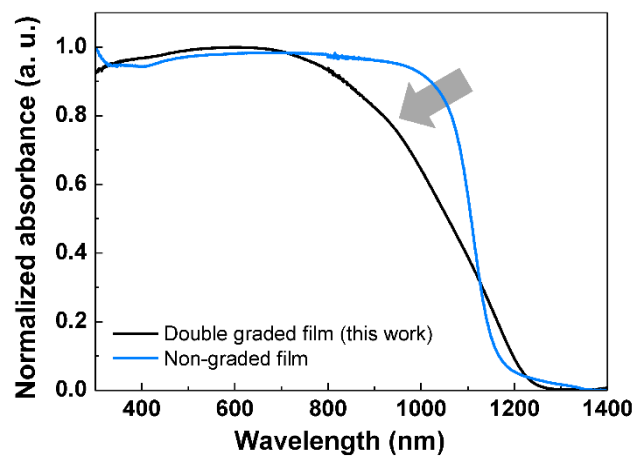

**Figure S4.** Comparison of absorption spectra of the double graded CIGSSe film and the non-graded CIGSSe film on glass substrate showing absorption loss of the double graded one (see an arrow).

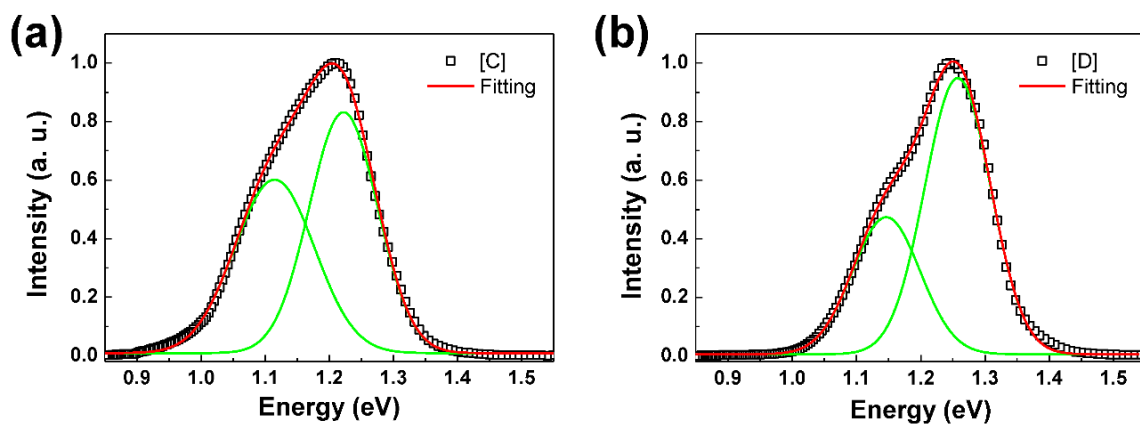

**Figure S5.** Photoluminescence (PL) spectra of (a) sample [C] and (b) sample [D] showed the wide and asymmetric shapes, which were deconvoluted by two Gaussian functions.

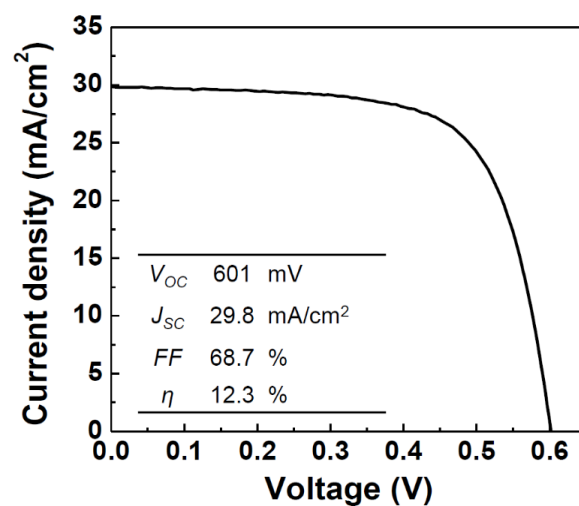

**Figure S6.** The current density-voltage ( $J$ - $V$ ) characteristics measured with an anti-reflection layer ( $MgF_2$ , 100 nm) under simulated AM 1.5G illumination. The efficiency of the cells was calculated per active area (0.249 cm<sup>2</sup>).

#### Reference

- (1) Fergusson, J.; Hart, R. *CXC Chemistry*, Oxford University Press: Oxford, 1999.
